# Supplementary material
Source: PubMed Central journal article supplement (PMC5210244)

# Improving results of allogeneic hematopoietic cell transplantation for adults with acute lymphoblastic leukemia in first complete remission: an analysis from the Acute Leukemia Working Party of the European Society for Blood and Marrow Transplantation

Sebastian Giebel,<sup>1</sup> Myriam Labopin,<sup>2,3</sup> Gerard Socié,<sup>4</sup> Dietrich Beelen,<sup>5</sup> Paul Browne,<sup>6</sup> Liisa Volin,<sup>7</sup> Slawomira Kyrz-Krzemien,<sup>8</sup> Ibrahim Yakoub-Agha,<sup>9</sup> Mahmoud Aljurf,<sup>10</sup> Depei Wu,<sup>11</sup> Mauricette Michallet,<sup>12</sup> Renate Arnold,<sup>13</sup> Mohamad Mohty<sup>2\*</sup> and Arnon Nagler<sup>3,14\*</sup>

<sup>1</sup>Maria Sklodowska-Curie Memorial Cancer Center and Institute of Oncology, Gliwice Branch, Poland; <sup>2</sup>Hospital St. Antoine, Paris, France; <sup>3</sup>Acute Leukemia Working Party of the EBMT; <sup>4</sup>Hospital St. Louis, Paris, France; <sup>5</sup>University Hospital, Essen, Germany; <sup>6</sup>St. James's Hospital - Trinity College, Dublin, Ireland; <sup>7</sup>Helsinki University Central Hospital, Finland; <sup>8</sup>Silesian Medical University, Katowice, Poland; <sup>9</sup>University Lille, Inserm, CHU Lille, U995 - LIRIC - Lille Inflammation Research, International Center, Lille, France; <sup>10</sup>King Faisal Specialist Hospital & Research Centre, Riyadh, Saudi Arabia; <sup>11</sup>First Affiliated Hospital of Soochow University, Suzhou, China; <sup>12</sup>Centre Hospitalier Lyon Sud - Service Hématologie, Lyon, France; <sup>13</sup>Charité Universitätsmedizin Berlin - Campus Virchow Klinikum Berlin, Germany and <sup>14</sup>Chaim Sheba Medical Center, Tel-Hashomer, Israel

*\*MM and AN contributed equally to this work*

©2017 Ferrata Storti Foundation. This is an open-access paper. doi:10.3324/haematol.2016.145631

Received: March 3, 2016.

Accepted: September 22, 2016.

Pre-published: September 29, 2016.

Correspondence: [sgiebel@io.gliwice.pl](mailto:sgiebel@io.gliwice.pl)

---

**Supplemental Table 1:** Results of alloHSCT for patients with Philadelphia-positive ALL.

Changes over time in a period 1993-2012

| Period         | RI<br>(%, 95%CI)   | NRM<br>(%, 95%CI)  | LFS<br>(%, 95%CI)  | OS<br>(%, 95%CI)   |
|----------------|--------------------|--------------------|--------------------|--------------------|
| 1993-2002      | 40.7 ( 34 - 47.3)  | 25.1 (19.5 - 31.2) | 34.2 (27.7 - 40.6) | 45.3 (38.5 - 52.1) |
| 2003-2007      | 29.7 (25.6 - 33.9) | 28.4 (24.4 - 32.6) | 41.8 (37.3 - 46.4) | 54.6 (50 - 59.2)   |
| 2008-2012      | 22.9 (19.4 - 26.6) | 19.7 (16.5 - 23.2) | 57.1 (52.9 - 61.4) | 67.9 (63.9 – 72)   |
| <i>P</i> value | <0.0001            | 0.02               | <0.0001            | <0.0001            |

RI, relapse incidence; LFS, leukemia-free survival; OS, overall survival; NRM, non-relapse mortality; alloHCT allogeneic hematopoietic cell transplantation; MSD, matched sibling donor; URD, unrelated donor; CI, confidence interval

**Supplemental Table 2:** Results of alloHCT for patients with Philadelphia-negative ALL.  
Changes over time in a period 1993-2012

a) Univariate analysis for MSD-HCT

| Period         | RI<br>(%, 95%CI)    | NRM<br>(%, 95%CI)  | LFS<br>(%, 95%CI)   | OS<br>(%, 95%CI)    |
|----------------|---------------------|--------------------|---------------------|---------------------|
| 1993-2002      | 29.6% (22.9 - 36.5) | 16% (11 - 21.8)    | 54.5% (47 - 61.9)   | 62.5% (55.3 - 69.7) |
| 2003-2007      | 24.7% (20 - 29.8)   | 13.3% (9.7 - 17.4) | 61.9% (56.3 - 67.4) | 70.6% (65.4 - 75.9) |
| 2008-2012      | 23% (18 - 28.5)     | 13% (9.1 - 17.6)   | 63.9% (57.8 - 70)   | 70.9% (65 - 76.8)   |
| <i>P</i> value | 0.2                 | 0.6                | 0.04                | 0.01                |

b) Univariate analysis for URD-HCT

| Period         | RI<br>(%, 95%CI)     | NRM<br>(%, 95%CI)   | LFS<br>(%, 95%CI)    | OS<br>(%, 95%CI)    |
|----------------|----------------------|---------------------|----------------------|---------------------|
| 1993-2002      | 22.1% (13 - 32.6)    | 20.6% (11.9 - 30.9) | 57.4% (45.6 - 69.1)  | 63.2% (51.8 - 74.7) |
| 2003-2007      | 22.2 % (17.4 - 27.5) | 22% (17.2 - 27.2)   | 55.5% (49.5 - 61.6)  | 60.7% (54.8 - 66.7) |
| 2008-2012      | 20.1 % (15.6 - 25.1) | 20.6% (16.1 - 25.4) | 59.3 % (53.5 - 65.1) | 64.8% (59.1 - 70.5) |
| <i>P</i> value | 0.9                  | 0.64                | 0.83                 | 0.76                |

c) Multivariate analysis

|                   | Factor                       | HR (95% CI)      | <i>P</i> |
|-------------------|------------------------------|------------------|----------|
| NRM               | Year of alloHCT              | 0.98 (0.95-1.01) | 0.17     |
|                   | Recipient age (per 10 years) | 1.35 (1.11-1.52) | <0.00001 |
|                   | MSD vs. URD                  | 1.59 (1.25-2.03) | 0.0002   |
| Relapse           | Year of alloHCT              | 0.97 (0.95-0.99) | 0.02     |
|                   | Recipient age (per 10 years) | 1.03 (0.93-1.14) | 0.59     |
|                   | MSD vs. URD                  | 0.95 (0.76-1.17) | 0.61     |
| Treatment failure | Year of alloHCT              | 0.97 (0.96-0.99) | 0.006    |
|                   | Recipient age (per 10 years) | 1.16 (1.08-1.26) | 0.0001   |
|                   | MSD vs. URD                  | 1.19 (1.01-1.4)  | 0.03     |
| Overall mortality | Year of alloHCT              | 0.97 (0.95-0.99) | 0.001    |
|                   | Recipient age (per 10 years) | 1.22 (1.12-1.32) | <0.00001 |
|                   | MSD vs. URD                  | 1.27 (1.07-1.5)  | 0.006    |

RI, relapse incidence; LFS, leukemia-free survival; OS, overall survival; NRM, non-relapse mortality; alloHCT allogeneic hematopoietic cell transplantation; MSD, matched sibling donor; URD, unrelated donor; HR, hazard ratio; CI, confidence interval

**Supplemental Fig. 1.** Leukemia-free survival (LFS) of patients with Philadelphia-positive ALL treated with alloHSCT. Changes over time in the period 1993-2012

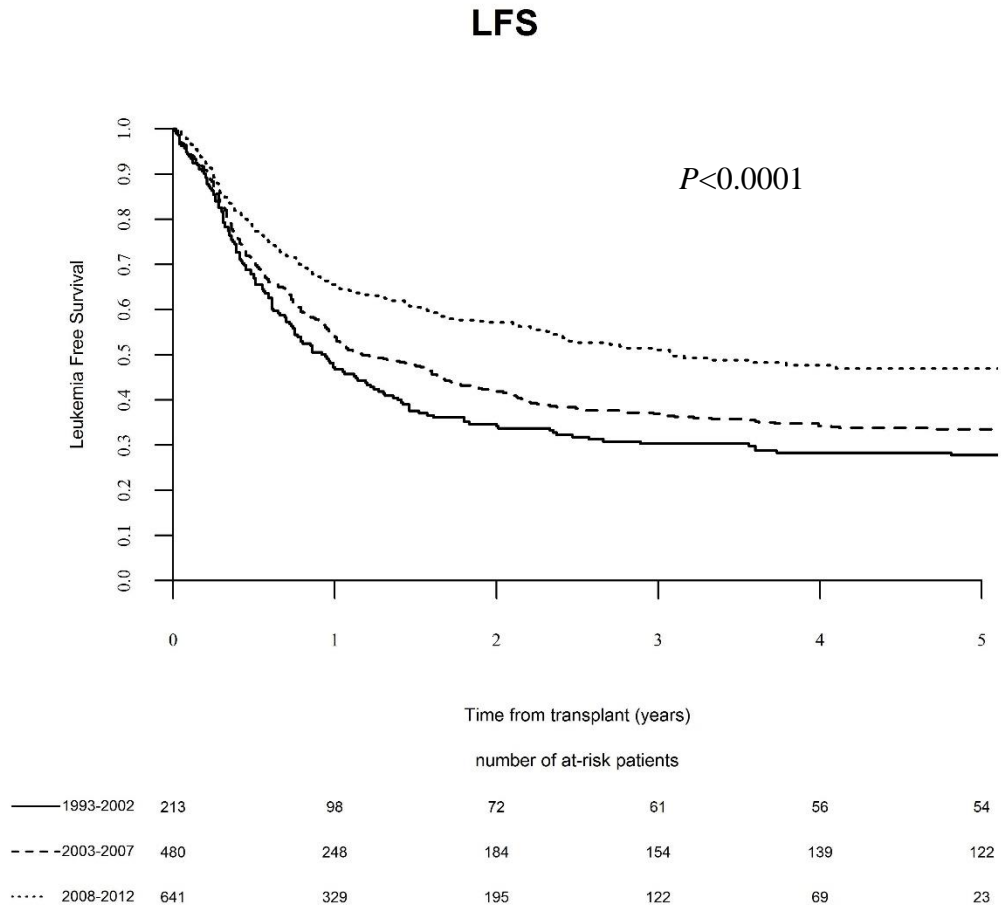

**Supplemental Fig. 2.** Leukemia-free survival (LFS) for patients with Philadelphia-positive ALL compared to Philadelphia-negative ALL treated with alloHSCT the period 2008-2012

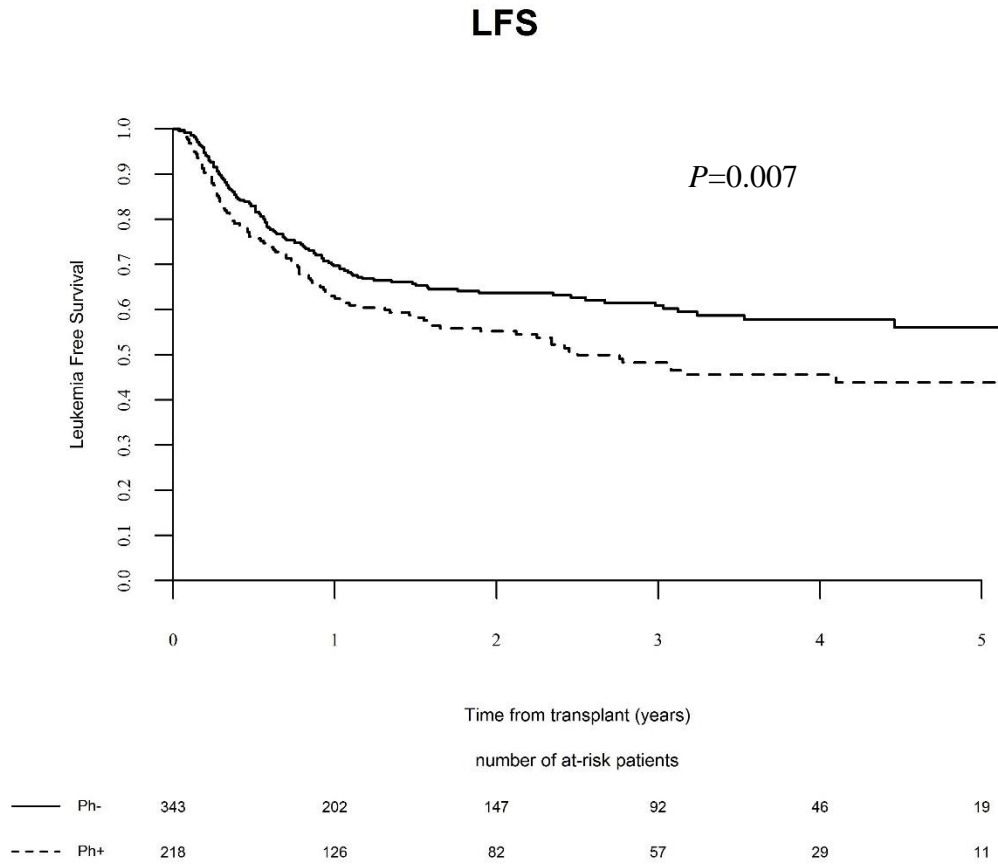

**Supplemental Fig. 3.** Leukemia-free survival (LFS) according to type of donor for alloHSCT performed in the period 2008-2012

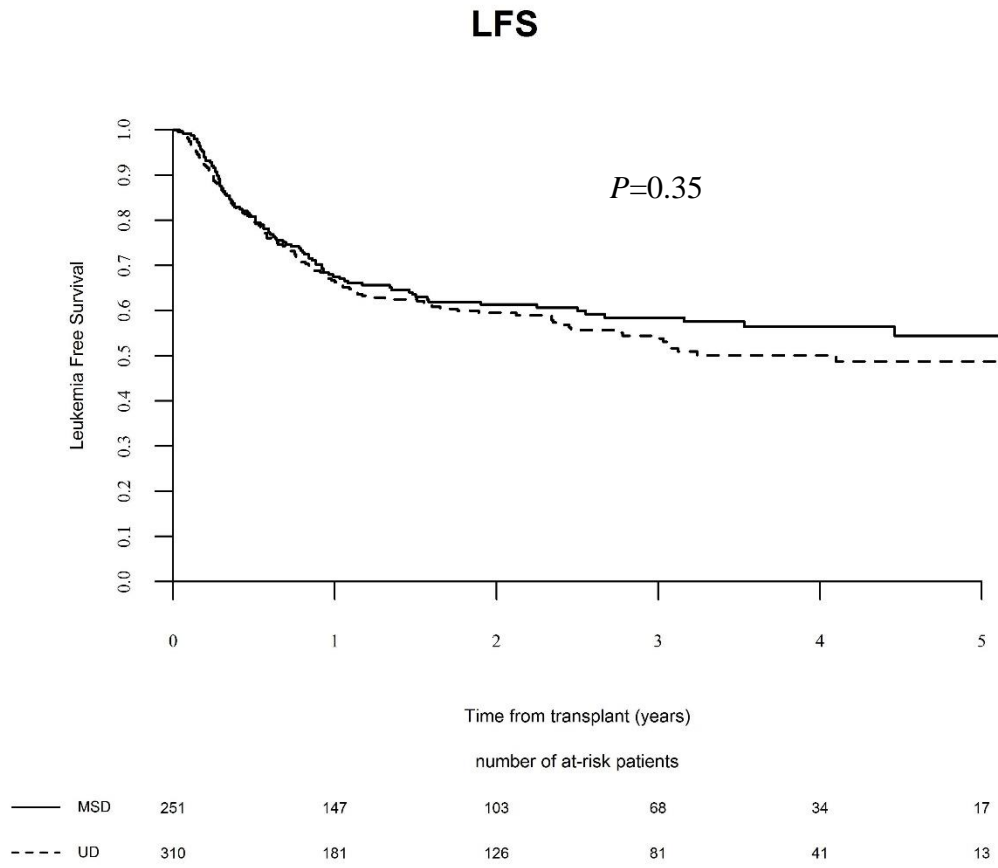

Supplement: 2016.145631.GIEBEL_SUPPL.pdf [file 2016.145631.GIEBEL_SUPPL.pdf]
