# Supplementary material
Source: PubMed Central journal article supplement (PMC5210244)
Supplement: 2016_145631-Disclosures_and_Contributions.pdf [file 2016_145631-Disclosures_and_Contributions.pdf]

Haematologica  
HAEMATOL/2016/145631  
Version 4

Improving results of allogeneic hematopoietic cell transplantation for adults with acute lymphoblastic leukemia in first complete remission: an analysis from Acute Leukemia Working Party of the European Society for Blood and Marrow Transplantation

Sebastian Giebel, Myriam Labopin, Gerard Socie', Dietrich Beelen, Paul Browne, Liisa Volin, Slawomira Kyrz-Krzemien, Ibrahim Yakoub-Agha, Mahmoud Aljurf, Depei Wu, Mauricette Michallet, Renate Arnold, Mohamad Mohty, and Arnon Nagler

Disclosures: None

Contributions: SG performed research and wrote the manuscript; ML analyzed data; GS, DB, PB, LV, SK-K, IY-A, MA, DW, MM, RA provided data and revised manuscript; MM and AN supervised the study and revised the manuscript
